# Supplementary material
Source: Springer Nature journal article supplement (https://www.springermedizin.de/resource/supplementary/12885_2013_4401_MOESM3_ESM.pdf/9466318)

**Negative**

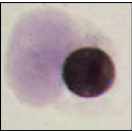

**Weak**

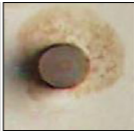

**Moderate**

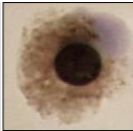

**Strong**

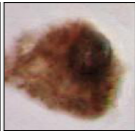

**Negative**

**1 +**

**2 ++**

**3 +++**

Supplement: MOESM3 [file 9466318]
